# Supplementary material
Source: PubMed Central journal article supplement (PMC2817627)
Supplement: en.2009-0978_1.pdf [file en.2009-0978_1.pdf]

**Supplemental Fig. 1.** Mean ( $\pm$ SEM) KiSS-1 (A), GPR54 (B), GnRH-1 (C), and GnRH-R1 (D) mRNA levels in the testes of LD, SD-R, and SD-NR animals were quantified by real-time PCR. Data are presented relative to  $\beta$ -actin.

**Supplemental Fig. 2.** Alignments of the deduced amino acid sequences for the Syrian hamster RFRP precursor (A), GPR147 (B), and GPR74 (C) with mammalian orthologs from other species (i.e., mouse, rat, and human).

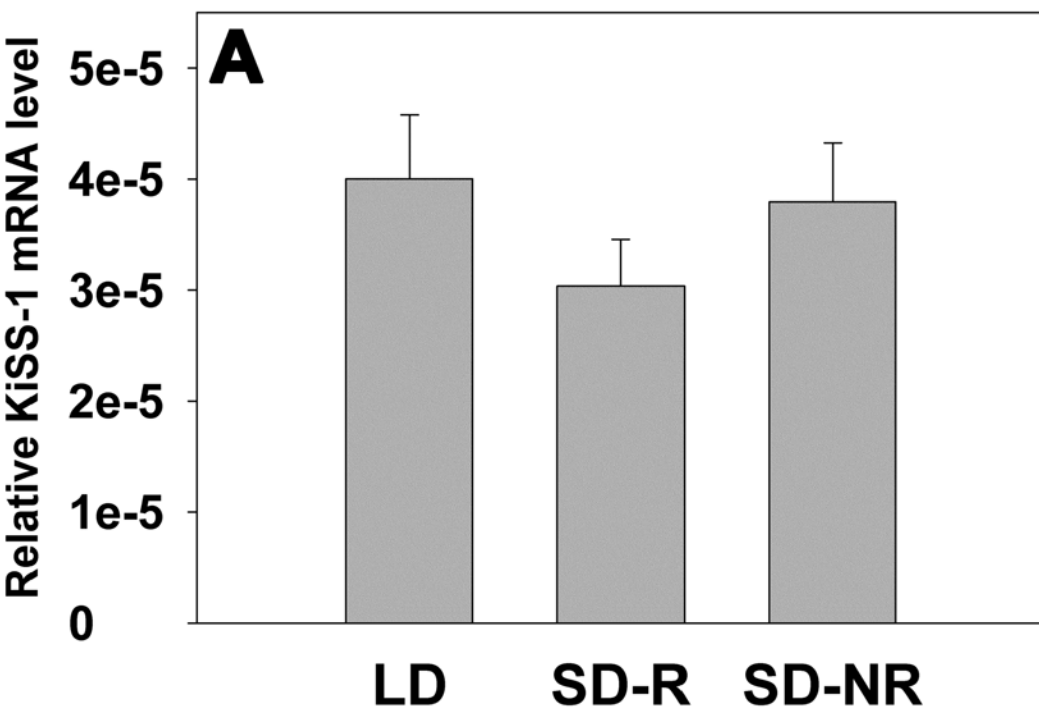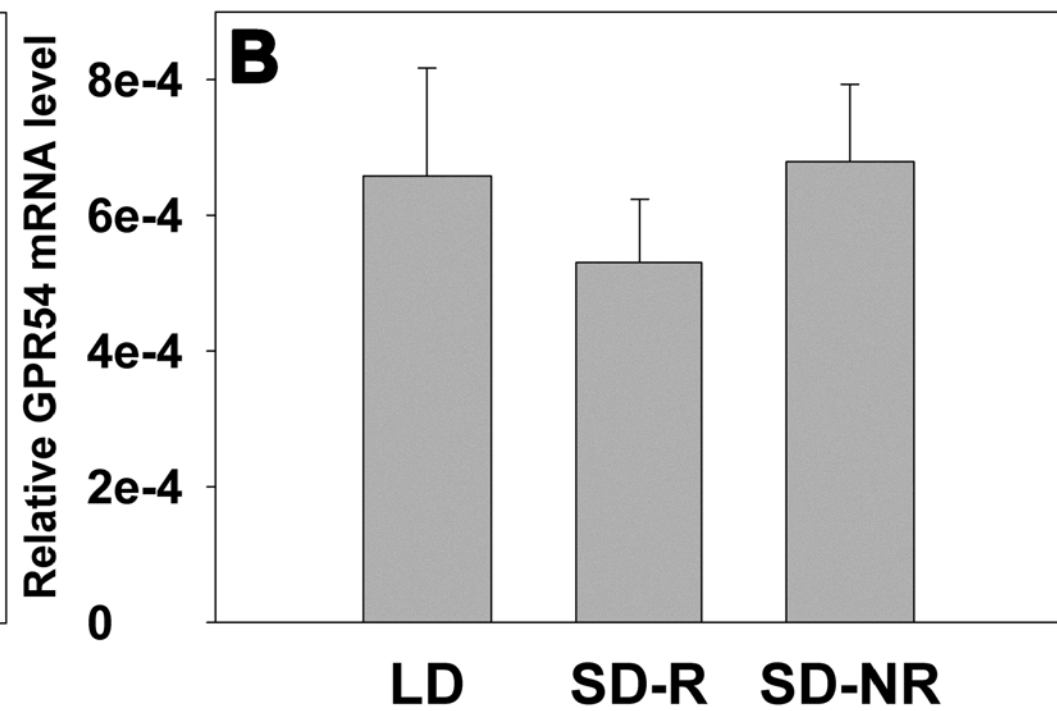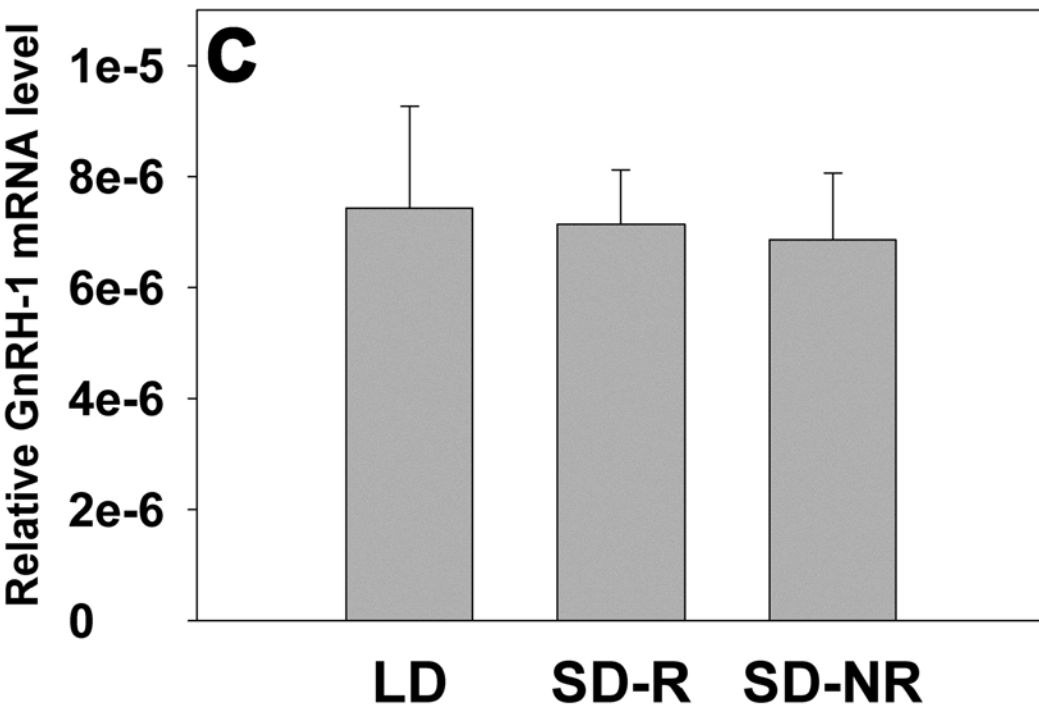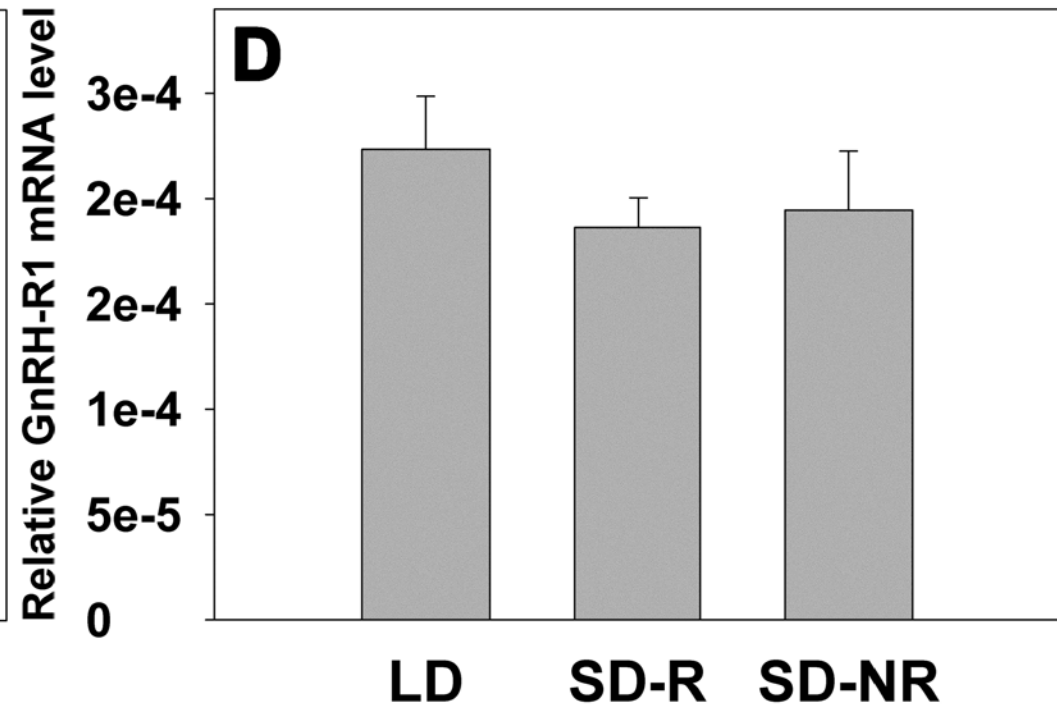

## A

## RFRP

## Section 1

|                        | (1) | 1      | 10       | 20       | 30       | 49                       |
|------------------------|-----|--------|----------|----------|----------|--------------------------|
| M. auratus_DQ371799    | (1) | -----  | -----    | -----    | LMPHC    | HSKEKDDKYSQPRG           |
| M. musculus_BC116905   | (1) | MEIISL | LKRFILLT | VATSSFLT | SNTFCTDE | FMMPHFHSKEGDGKYSQLRG     |
| R. norvegicus_AB040288 | (1) | MEIIS  | SKRFILLT | LATSSFLT | SNTLCS   | DELMMPHFHSKEGYGKYQLRG    |
| H. sapiens_NM_022150   | (1) | MEIIS  | SKLFILLT | LATSSLL  | LTSNIF   | CADELVMSNLHSKENYDKYSEPRG |
| Consensus              | (1) | MEIIS  | SKRFILLT | LATSSFLT | SNTFCS   | DELMMPHFHSKEGYGKYSQPRG   |

## Section 2

|                        | (50) | 50         | 60        | 70       | 80      | 98                    |
|------------------------|------|------------|-----------|----------|---------|-----------------------|
| M. auratus_DQ371799    | (21) | ITKGEKERSV | SFQELKDWG | AKNVIKMS | PAPAN   | KVPHSAANLPLRFGRTL     |
| M. musculus_BC116905   | (50) | IPKGEKERSV | SFQELKDWG | AKNVIKMS | PAPAN   | KVPHSAANLPLRFGRTI     |
| R. norvegicus_AB040288 | (50) | IPKGVKERSV | TFQELKDWG | AKKDIKMS | PAPAN   | KVPHSAANLPLRFGRNI     |
| H. sapiens_NM_022150   | (50) | YPKG--     | ERSLNF    | EELKDWGP | KNVIKMS | TPAVNKMPHSAANLPLRFGRN |
| Consensus              | (50) | IPKGEKERSV | SFQELKDWG | AKNVIKMS | PAPAN   | KVPHSAANLPLRFGRTI     |

## RFRP1

## Section 3

|                        | (99) | 99     | 110       | 120   | 130      | 147                      |
|------------------------|------|--------|-----------|-------|----------|--------------------------|
| M. auratus_DQ371799    | (70) | EEERSP | -----     | RAW   | SNMEAMIS | SRVPSLPQRFGRTTARS-IPKTPS |
| M. musculus_BC116905   | (99) | DEKRS  | -----     | AARV  | NMEAGTRS | HFPSPLPQRFGRTTAR--SPKTPA |
| R. norvegicus_AB040288 | (99) | EDRRS  | -----     | RARA  | NMEAGTMS | HFPSPLPQRFGRTTARR-ITKTLA |
| H. sapiens_NM_022150   | (97) | QEERS  | AGATANLPL | RSGR  | NMEVSLV  | RRVPSLPQRFGRTTTAKSVCRLMS |
| Consensus              | (99) | EEERSP | -----     | RARAN | NMEAGT   | LSRVPSLPQRFGRTTARKIPKTPA |

## RFRP2

## RFRP3

## Section 4

|                        | (148) | 148      | 160      | 170     | 180     | 196                        |
|------------------------|-------|----------|----------|---------|---------|----------------------------|
| M. auratus_DQ371799    | (110) | HLLQRSLH | SLATSELL | YAMTCQH | QEIQSPG | -----                      |
| M. musculus_BC116905   | (138) | DLPQKPLH | SLGSSELL | YVMICQH | QEIQSPG | GKRTRRGAFVETDDAERKP        |
| R. norvegicus_AB040288 | (139) | GLPQKSLH | SLASSELL | YAMTRQH | QEIQSPG | QEQPRKRVFTETDDAERKQ        |
| H. sapiens_NM_022150   | (146) | DLCQGS   | MHSPCAN  | DLFYSM  | TCQH    | QEIQNPDQKQSRRLLFKKIDDDELKQ |
| Consensus              | (148) | DLPQKSLH | SLASSELL | YAMTCQH | QEIQSPG | QKQSRRLLFETDDAERKQ         |

## Section 5

|                        | (197) | 197    | 213         |
|------------------------|-------|--------|-------------|
| M. auratus_DQ371799    | (140) | -----  | -----       |
| M. musculus_BC116905   | (187) | EK     | -----       |
| R. norvegicus_AB040288 | (188) | EKIGNL | QPVLQGAMKL- |
| H. sapiens_NM_022150   | (195) | EK     | -----       |
| Consensus              | (197) | EK     | -----       |

**B****GPR147**

## Section 1

|                         | (1) | 10        | 20    | 30                    | 48    |
|-------------------------|-----|-----------|-------|-----------------------|-------|
| M. auratus_GU172168     | (1) | -----     | ----- | -----                 | ----- |
| M. musculus_XM_137119   | (1) | MIRLEKDLN | SEPV  | RKEKQRLSLVASV         | VSAE  |
| R. norvegicus_NM_022291 | (1) | -----     | ----- | -----                 | ----- |
| H. sapiens_NM_022146    | (1) | -----     | ----- | -----                 | ----- |
| Consensus               | (1) |           |       | MEAEPSQPPNGSWPLSQNGSD |       |

## Section 2

|                         | (49) | 60                                          | 70                            | 80                                    | 96    |
|-------------------------|------|---------------------------------------------|-------------------------------|---------------------------------------|-------|
| M. auratus_GU172168     | (1)  | -----                                       | -----                         | -----                                 | ----- |
| M. musculus_XM_137119   | (49) | ETA                                         | VA                            | SLTFSSYYQHSSPVAAMFIAAYALIFLLCMVGNTLVC | FIVLK |
| R. norvegicus_NM_022291 | (23) | ET                                          | SMATSLTFSSYYQHSSPVAAMFIAAYVLI | FLLCMVGNTLVC                          | FIVLK |
| H. sapiens_NM_022146    | (23) | EAT                                         | PATNLT                        | FSSYYQHSSPVAAMFIVAYALIFLLCMVGNTLVC    | FIVLK |
| Consensus               | (49) | ETSPATSLTFSSYYQHSSPVAAMFIAAYALIFLLCMVGNTLVC | FIVLK                         |                                       |       |

## Section 3

|                         | (97) | 110                      | 120                   | 130          | 144      |
|-------------------------|------|--------------------------|-----------------------|--------------|----------|
| M. auratus_GU172168     | (1)  | -----                    | -----                 | -----        | -----    |
| M. musculus_XM_137119   | (97) | NRHMRTVTNMFILNLAVSDLLVGI | FCMPTTLVDNLI          | TGWPF        | FDNATCKM |
| R. norvegicus_NM_022291 | (71) | NRHMRTVTNMFILNLAVSDLLVGI | FCMPTTLVDNLI          | TGWPF        | FDNATCKM |
| H. sapiens_NM_022146    | (71) | NRHM                     | HFTVTNMFILNLAVSDLLVGI | FCMPTTLVDNLI | TGWPF    |
| Consensus               | (97) | NRHMRTVTNMFILNLAVSDLLVGI | FCMPTTLVDNLI          | TGWPF        | FDNATCKM |

## Section 4

|                         | (145) | 145                                  | 150   | 160     | 170   | 180   | 192   |
|-------------------------|-------|--------------------------------------|-------|---------|-------|-------|-------|
| M. auratus_GU172168     | (1)   | -----                                | ----- | -----   | ----- | ----- | ----- |
| M. musculus_XM_137119   | (145) | SGLVQGMSVSASVFTLVAIAVERFRCIVHPPREKLT | LRKAL | ETIAVIW |       |       |       |
| R. norvegicus_NM_022291 | (119) | SGLVQGMSVSASVFTLVAIAVERFRCIVHPPREKLT | LRKAL | ETIAVIW |       |       |       |
| H. sapiens_NM_022146    | (119) | SGLVQGMSVSASVFTLVAIAVERFRCIVHPPREKLT | LRKAL | ETIAVIW |       |       |       |
| Consensus               | (145) | SGLVQGMSVSASVFTLVAIAVERFRCIVHPPREKLT | LRKAL | ETIAVIW |       |       |       |

## Section 5

|                         | (193) | 193                    | 200            | 210        | 220   | 230   | 240   |
|-------------------------|-------|------------------------|----------------|------------|-------|-------|-------|
| M. auratus_GU172168     | (1)   | -----                  | -----          | -----      | ----- | ----- | ----- |
| M. musculus_XM_137119   | (193) | ALALLIMCPSAVTTLVTREEHF | MFLDARNRSYPLYS | CWEAWPEKGM | RK    |       |       |
| R. norvegicus_NM_022291 | (167) | ALALLIMCPSAVTTLVTREEHF | MFLDARNRSYPLYS | CWEAWPEKGM | RK    |       |       |
| H. sapiens_NM_022146    | (167) | ALALLIMCPSAVTTLVTREEHF | MFLDARNRSYPLYS | CWEAWPEKGM | RK    |       |       |
| Consensus               | (193) | ALALLIMCPSAVTTLVTREEHF | MFLDARNRSYPLYS | CWEAWPEKGM | RK    |       |       |

## Section 6

|                         | (241) | 241  | 250 | 260     | 270                     | 288     |
|-------------------------|-------|------|-----|---------|-------------------------|---------|
| M. auratus_GU172168     | (13)  | VYTA | VLF | FAHIYLA | PLALIVVMYARIARKLCQAPGP  | ARDTEEA |
| M. musculus_XM_137119   | (241) | VYTA | VLF | FAHIYLA | PLALIVVMYARIARKLCQAPGP  | ARDTEEA |
| R. norvegicus_NM_022291 | (215) | VYTA | VLF | FAHIYLV | PLALIVVMYARIARKLCQAPGP  | ARDTEEA |
| H. sapiens_NM_022146    | (215) | VYTT | VLF | SHIYLA  | PLALIVVMYARIARKLCQAPGPA | PGGEEA  |
| Consensus               | (241) | VYTA | VLF | FAHIYLA | PLALIVVMYARIARKLCQAPGP  | ARDTEEA |

## Section 7

|                         | (289) | 289                         | 300       | 310  | 320       | 336 |
|-------------------------|-------|-----------------------------|-----------|------|-----------|-----|
| M. auratus_GU172168     | (61)  | ASRRRARVVHMLVMVALFFTLSWLPLW | ALLLLIDYG | QLSE | ELQLHLLSV |     |
| M. musculus_XM_137119   | (289) | ASRRRARVVHMLVMVALFFTLSWLPLW | ALLLLIDYG | QLSE | ELQLHLLSV |     |
| R. norvegicus_NM_022291 | (263) | TSRRRARVVHMLVMVALFFTLSWLPLW | ALLLLIDYG | QLSE | ELQLHLLSV |     |
| H. sapiens_NM_022146    | (261) | ASRRRARVVHMLVMVALFFTLSWLPLW | ALLLLIDYG | QLSA | ELQLHL    | VTV |
| Consensus               | (289) | ASRRRARVVHMLVMVALFFTLSWLPLW | ALLLLIDYG | QLSE | ELQLHLLSV |     |

## Section 8

|                         | (337) | 337  | 350     | 360         | 370    | 384 |
|-------------------------|-------|------|---------|-------------|--------|-----|
| M. auratus_GU172168     | (109) | YAFP | LAHWLAF | FHSSANPIIYG | YFNENF |     |
| M. musculus_XM_137119   | (337) | YAFP | LAHWLAF | FHSSANPIIYG | YFNENF |     |
| R. norvegicus_NM_022291 | (311) | YAFP | LAHWLAF | FHSSANPIIYG | YFNENF |     |
| H. sapiens_NM_022146    | (309) | YAFP | LAHWLAF | FHSSANPIIYG | YFNENF |     |
| Consensus               | (337) | YAFP | LAHWLAF | FHSSANPIIYG | YFNENF |     |

## Section 9

|                         | (385) | 385     | 390   | 400             | 410       | 420      | 432                |
|-------------------------|-------|---------|-------|-----------------|-----------|----------|--------------------|
| M. auratus_GU172168     | (137) | -----   | ----- | -----           | -----     | -----    | -----              |
| M. musculus_XM_137119   | (385) | KQAYSER | PGRL  | LRRLRRVVVDVQPSD | SGLPSES   | SGPSSGVP | GGNRLPLRNG         |
| R. norvegicus_NM_022291 | (359) | KQAYSER | PNRLL | LRRLRRVVVDVQPSD | SGLPSES   | SGPSSGVP | GGPGRPLRNG         |
| H. sapiens_NM_022146    | (357) | KEAYSER | PGGLL | HRRV            | FVVVRFPSD | SGLPSES  | SGPSSGAPRPGRLPLRNG |
| Consensus               | (385) | KQAYSER | PGRL  | LRRLRRVVVDVQPSD | SGLPSES   | SGPSSGVP | GGPGRPLRNG         |

## Section 10

|                         | (433) | 433   | 440   | 459             |
|-------------------------|-------|-------|-------|-----------------|
| M. auratus_GU172168     | (137) | ----- | ----- | -----           |
| M. musculus_XM_137119   | (433) | RV    | AHQD  | GPREGPGCNHMPLTI |
| R. norvegicus_NM_022291 | (407) | RV    | AHQD  | GPREGPGCNHMPLTI |
| H. sapiens_NM_022146    | (405) | RV    | AHQD  | GPREGPGCSHPLTI  |
| Consensus               | (433) | RV    | AHQD  | GPREGPGCNHMPLTI |

**C****GPR74**

Section 1

|                         |     |       |    |    |    |    |       |   |   |   |   |   |   |   |   |   |   |   |   |   |   |   |   |   |   |   |   |   |   |   |   |   |   |   |   |   |   |   |   |   |   |   |   |   |   |   |   |   |
|-------------------------|-----|-------|----|----|----|----|-------|---|---|---|---|---|---|---|---|---|---|---|---|---|---|---|---|---|---|---|---|---|---|---|---|---|---|---|---|---|---|---|---|---|---|---|---|---|---|---|---|---|
|                         | (1) | 1     | 10 | 20 | 30 | 48 |       |   |   |   |   |   |   |   |   |   |   |   |   |   |   |   |   |   |   |   |   |   |   |   |   |   |   |   |   |   |   |   |   |   |   |   |   |   |   |   |   |   |
| M. auratus_GU172169     | (1) | ----- |    |    |    |    | ----- |   |   |   |   |   |   |   |   |   |   |   |   |   |   |   |   |   |   |   |   |   |   |   |   |   |   |   |   |   |   |   |   |   |   |   |   |   |   |   |   |   |
| M. musculus_NM_133192   | (1) | M     | S  | E  | K  | W  | D     | S | N | S | S | E | S | W | N | H | I | W | S | G | N | D | T | Q | H | H | W | S | D | I | N | I | T | Y | V | N | Y | L | H | Q | P | Q | V | A | A | V | F |   |
| R. norvegicus_NM_023980 | (1) | M     | G  | K  | F  | W  | D     | S | N | S | S | G | S | W | D | H | I | W | S | G | N | D | T | Q | H | P | W | S | D | I | N | I | T | Y | N | Y | L | H | Q | H | V | T | A | V | F |   |   |   |
| H. sapiens_NM_053036    | (1) | M     | N  | E  | K  | W  | D     | S | N | S | S | E | N | W | H | P | I | W | N | V | N | D | T | K | H | H | L | Y | S | D | I | N | I | T | Y | V | N | Y | L | H | Q | P | Q | V | A | A | T | F |
| Consensus               | (1) | M     | E  | K  | W  | D  | S     | N | S | S | E | S | W | H | I | W | S | G | N | D | T | Q | H | H | W | S | D | I | N | I | T | Y | V | N | Y | L | H | Q | P | Q | V | A | A | V | F |   |   |   |

Section 2

|                         |      |       |    |    |    |    |                      |   |   |   |   |   |   |   |   |   |   |   |   |   |   |   |   |   |   |   |   |   |   |   |   |   |   |   |   |   |   |   |   |   |   |   |   |   |   |   |   |   |   |
|-------------------------|------|-------|----|----|----|----|----------------------|---|---|---|---|---|---|---|---|---|---|---|---|---|---|---|---|---|---|---|---|---|---|---|---|---|---|---|---|---|---|---|---|---|---|---|---|---|---|---|---|---|---|
|                         | (49) | 49    | 60 | 70 | 80 | 96 |                      |   |   |   |   |   |   |   |   |   |   |   |   |   |   |   |   |   |   |   |   |   |   |   |   |   |   |   |   |   |   |   |   |   |   |   |   |   |   |   |   |   |   |
| M. auratus_GU172169     | (1)  | ----- |    |    |    |    | HTVTNFFILNLAISDLLVGI |   |   |   |   |   |   |   |   |   |   |   |   |   |   |   |   |   |   |   |   |   |   |   |   |   |   |   |   |   |   |   |   |   |   |   |   |   |   |   |   |   |   |
| M. musculus_NM_133192   | (49) | I     | S  | S  | Y  | L  | L                    | I | F | V | L | C | M | V | G | N | T | V | V | C | F | I | V | I | R | N | R | H | M | H | T | V | T | N | F | F | I | L | N | L | A | I | S | D | L | L | V | G | I |
| R. norvegicus_NM_023980 | (49) | I     | S  | S  | Y  | F  | L                    | I | F | F | L | C | M | V | G | N | T | V | V | C | F | V | I | R | N | R | Y | M | H | T | V | T | N | F | F | I | F | N | L | A | I | S | D | L | L | V | G | I |   |
| H. sapiens_NM_053036    | (49) | I     | I  | S  | Y  | F  | L                    | I | F | F | L | C | M | G | N | T | V | V | C | F | I | V | M | R | N | K | H | M | H | T | V | T | N | L | F | I | L | N | L | A | I | S | D | L | L | V | G | I |   |
| Consensus               | (49) | I     | S  | S  | Y  | F  | L                    | I | F | F | L | C | M | V | G | N | T | V | V | C | F | I | V | I | R | N | R | H | M | H | T | V | T | N | F | F | I | L | N | L | A | I | S | D | L | L | V | G | I |

Section 3

|                         |      |    |     |     |     |     |   |   |   |   |   |   |   |   |   |   |   |   |   |   |   |   |   |   |   |   |   |   |   |   |   |   |   |   |   |   |   |   |   |   |   |   |   |   |   |   |   |   |   |
|-------------------------|------|----|-----|-----|-----|-----|---|---|---|---|---|---|---|---|---|---|---|---|---|---|---|---|---|---|---|---|---|---|---|---|---|---|---|---|---|---|---|---|---|---|---|---|---|---|---|---|---|---|---|
|                         | (97) | 97 | 110 | 120 | 130 | 144 |   |   |   |   |   |   |   |   |   |   |   |   |   |   |   |   |   |   |   |   |   |   |   |   |   |   |   |   |   |   |   |   |   |   |   |   |   |   |   |   |   |   |   |
| M. auratus_GU172169     | (21) | F  | C   | M   | P   | I   | T | L | L | D | N | I | I | A | G | W | P | F | G | S | N | M | C | K | I | S | G | L | V | Q | G | I | S | V | A | S | V | F | T | L | V | A | I | A | V | D | S | E |   |
| M. musculus_NM_133192   | (97) | F  | C   | M   | P   | I   | T | L | L | D | N | I | I | A | G | W | P | F | G | S | S | M | C | K | I | S | G | L | V | Q | G | I | S | V | A | A | S | V | F | T | L | V | A | I | A | V | D | R | E |
| R. norvegicus_NM_023980 | (97) | F  | C   | M   | P   | I   | T | L | L | D | N | I | I | A | G | W | P | F | G | S | S | M | C | K | I | S | G | L | V | Q | G | I | S | V | A | A | S | V | F | T | L | V | A | I | A | V | D | R | E |
| H. sapiens_NM_053036    | (97) | F  | C   | M   | P   | I   | T | L | L | D | N | I | I | A | G | W | P | F | G | N | T | M | C | K | I | S | G | L | V | Q | G | I | S | V | A | A | S | V | F | T | L | V | A | I | A | V | D | R | E |
| Consensus               | (97) | F  | C   | M   | P   | I   | T | L | L | D | N | I | I | A | G | W | P | F | G | S | S | M | C | K | I | S | G | L | V | Q | G | I | S | V | A | A | S | V | F | T | L | V | A | I | A | V | D | R | E |

Section 4

|                         |       |     |     |     |     |     |     |   |   |   |   |   |   |   |   |   |   |   |   |   |   |   |   |   |   |   |   |   |   |   |   |   |   |   |   |   |   |   |   |   |   |   |   |   |   |   |   |   |
|-------------------------|-------|-----|-----|-----|-----|-----|-----|---|---|---|---|---|---|---|---|---|---|---|---|---|---|---|---|---|---|---|---|---|---|---|---|---|---|---|---|---|---|---|---|---|---|---|---|---|---|---|---|---|
|                         | (145) | 145 | 150 | 160 | 170 | 180 | 192 |   |   |   |   |   |   |   |   |   |   |   |   |   |   |   |   |   |   |   |   |   |   |   |   |   |   |   |   |   |   |   |   |   |   |   |   |   |   |   |   |   |
| M. auratus_GU172169     | (69)  | W   | C   | V   | V   | Y   | P   | F | K | P | K | L | T | V | K | T | A | F | V | T | I | V | I | I | W | G | L | A | G | A | I | M | S | P | S | A | V | M | L | H | V | Q | E | E | K | Y | C | V |
| M. musculus_NM_133192   | (145) | R   | C   | V   | V   | Y   | P   | F | K | P | K | L | T | V | K | T | A | F | V | T | I | V | I | I | W | G | L | A | I | A | I | M | T | P | S | A | I | M | L | H | V | Q | E | E | K | Y | R | V |
| R. norvegicus_NM_023980 | (145) | R   | C   | V   | V   | Y   | P   | F | K | P | K | L | T | V | K | T | A | F | V | M | I | V | I | I | W | G | L | A | I | T | I | M | T | P | S | A | I | M | L | H | V | Q | E | E | K | Y | R | V |
| H. sapiens_NM_053036    | (145) | Q   | C   | V   | V   | Y   | P   | F | K | P | K | L | T | V | K | T | A | F | V | I | I | V | I | I | W | V | L | A | I | T | I | M | S | P | S | A | V | M | L | H | V | Q | E | E | K | Y | R | V |
| Consensus               | (145) | R   | C   | V   | V   | Y   | P   | F | K | P | K | L | T | V | K | T | A | F | V | T | I | V | I | I | W | G | L | A | I | T | I | M | S | P | S | A | I | M | L | H | V | Q | E | E | K | Y | R | V |

Section 5

|                         |       |     |     |     |     |     |     |   |   |   |   |   |   |   |   |   |   |   |   |   |   |   |   |   |   |   |   |   |   |   |   |   |   |   |   |   |   |   |   |   |   |   |   |   |   |   |   |   |   |
|-------------------------|-------|-----|-----|-----|-----|-----|-----|---|---|---|---|---|---|---|---|---|---|---|---|---|---|---|---|---|---|---|---|---|---|---|---|---|---|---|---|---|---|---|---|---|---|---|---|---|---|---|---|---|---|
|                         | (193) | 193 | 200 | 210 | 220 | 230 | 240 |   |   |   |   |   |   |   |   |   |   |   |   |   |   |   |   |   |   |   |   |   |   |   |   |   |   |   |   |   |   |   |   |   |   |   |   |   |   |   |   |   |   |
| M. auratus_GU172169     | (117) | R   | L   | S   | S   | H   | N   | K | T | S | T | V | Y | W | C | R | E | D | W | P | K | Q | E | M | R | R | I | Y | T | T | V | L | F | A | T | I | Y | L | A | P | L | S | L | I | V | M | Y | A |   |
| M. musculus_NM_133192   | (193) | R   | L   | S   | S   | H   | N   | K | T | S | T | V | Y | W | C | R | E | D | W | P | R | H | E | M | R | R | I | Y | T | T | V | L | F | A | T | I | Y | L | A | P | L | S | L | I | V | I | M | Y | A |
| R. norvegicus_NM_023980 | (193) | R   | L   | S   | S   | H   | N   | K | T | S | T | V | Y | W | C | R | E | D | W | P | N | Q | E | M | R | R | I | Y | T | T | V | L | F | A | T | I | Y | L | A | P | L | S | L | I | V | I | M | Y | A |
| H. sapiens_NM_053036    | (193) | R   | L   | N   | S   | Q   | N   | K | T | S | P | V | Y | W | C | R | E | D | W | P | N | Q | E | M | R | K | I | Y | T | T | V | L | F | A | N | I | Y | L | A | P | L | S | L | I | V | I | M | Y | G |
| Consensus               | (193) | R   | L   | S   | S   | H   | N   | K | T | S | T | V | Y | W | C | R | E | D | W | P | N | Q | E | M | R | R | I | Y | T | T | V | L | F | A | T | I | Y | L | A | P | L | S | L | I | V | I | M | Y | A |

Section 6

|                         |       |     |     |     |     |     |   |   |   |   |   |   |   |   |   |   |   |   |   |   |   |   |   |   |   |   |   |   |   |   |   |   |   |   |   |   |   |   |   |   |    |   |    |   |   |   |   |   |
|-------------------------|-------|-----|-----|-----|-----|-----|---|---|---|---|---|---|---|---|---|---|---|---|---|---|---|---|---|---|---|---|---|---|---|---|---|---|---|---|---|---|---|---|---|---|----|---|----|---|---|---|---|---|
|                         | (241) | 241 | 250 | 260 | 270 | 288 |   |   |   |   |   |   |   |   |   |   |   |   |   |   |   |   |   |   |   |   |   |   |   |   |   |   |   |   |   |   |   |   |   |   |    |   |    |   |   |   |   |   |
| M. auratus_GU172169     | (165) | R   | I   | G   | A   | S   | L | F | K | T | S | A | H | C | M | G | K | Q | R | Q | E | Q | W | H | V | S | - | K | K | Q | K | V | I | K | M | L | L | I | V | A | -- | F | -- | L | S | W | L |   |
| M. musculus_NM_133192   | (241) | R   | I   | G   | A   | S   | L | F | K | T | A | A | H | C | T | G | K | Q | R | P | V | Q | W | H | V | S | - | K | K | Q | K | V | I | K | M | L | L | T | V | A | L  | L | F  | I | L | S | W | L |
| R. norvegicus_NM_023980 | (241) | R   | I   | G   | A   | S   | L | F | K | T | S | A | H | S | T | G | K | Q | R | L | E | Q | W | H | V | S | - | K | K | Q | K | V | I | K | M | L | L | T | V | A | L  | L | F  | I | L | S | W | L |
| H. sapiens_NM_053036    | (241) | R   | I   | G   | I   | S   | L | F | R | A | A | V | P | H | T | G | R | K | N | Q | E | Q | W | H | V | S | - | K | K | Q | K | I | K | M | L | L | I | V | A | L | L  | F | I  | L | S | W | L |   |
| Consensus               | (241) | R   | I   | G   | A   | S   | L | F | K | T | A | A | H | C | T | G | K | Q | R | Q | E | Q | W | H | V | S | - | K | K | Q | K | V | I | K | M | L | L | T | V | A | L  | L | F  | I | L | S | W | L |

Section 7

|                         |       |     |     |     |     |     |   |   |   |   |   |   |   |   |   |   |   |   |   |   |   |   |   |   |   |   |   |   |   |   |   |   |   |   |   |   |   |   |   |   |   |   |   |   |   |   |   |   |   |
|-------------------------|-------|-----|-----|-----|-----|-----|---|---|---|---|---|---|---|---|---|---|---|---|---|---|---|---|---|---|---|---|---|---|---|---|---|---|---|---|---|---|---|---|---|---|---|---|---|---|---|---|---|---|---|
|                         | (289) | 289 | 300 | 310 | 320 | 336 |   |   |   |   |   |   |   |   |   |   |   |   |   |   |   |   |   |   |   |   |   |   |   |   |   |   |   |   |   |   |   |   |   |   |   |   |   |   |   |   |   |   |   |
| M. auratus_GU172169     | (209) | P   | L   | W   | T   | L   | M | M | L | S | D | Y | A | D | L | S | P | N | K | L | R | V | I | N | I | Y | I | Y | P | F | A | H | W | L | A | I | C | N | S | S | V | N | P | I | I | Y | G | F | F |
| M. musculus_NM_133192   | (288) | P   | L   | W   | T   | L   | M | M | L | S | D | Y | T | D | L | S | P | N | K | L | R | I | N | I | Y | I | Y | P | F | A | H | W | L | A | F | C | N | S | S | V | N | P | I | I | Y | G | F | F |   |
| R. norvegicus_NM_023980 | (288) | P   | L   | W   | T   | L   | M | M | L | S | D | Y | A | D | L | S | P | N | K | L | R | V | I | N | I | Y | Y | P | F | A | H | W | L | A | F | C | N | S | S | V | N | P | I | I | Y | G | F | F |   |
| H. sapiens_NM_053036    | (289) | P   | L   | W   | T   | L   | M | M | L | S | D | Y | A | D | L | S | P | N | E | L | Q | I | N | I | Y | I | Y | P | F | A | H | W | L | A | F | G | N | S | S | V | N | P | I | I | Y | G | F | F |   |
| Consensus               | (289) | P   | L   | W   | T   | L   | M | M | L | S | D | Y | A | D | L | S | P | N | K | L | R | I | N | I | Y | I | Y | P | F | A | H | W | L | A | F | C | N | S | S | V | N | P | I | I | Y | G | F | F |   |

Section 8

|                         |       |     |     |     |     |     |   |   |   |   |   |   |   |   |    |    |       |   |   |   |   |   |   |   |   |   |   |   |   |   |   |   |   |   |   |   |   |   |   |   |   |   |   |   |   |   |   |   |
|-------------------------|-------|-----|-----|-----|-----|-----|---|---|---|---|---|---|---|---|----|----|-------|---|---|---|---|---|---|---|---|---|---|---|---|---|---|---|---|---|---|---|---|---|---|---|---|---|---|---|---|---|---|---|
|                         | (337) | 337 | 350 | 360 | 370 | 384 |   |   |   |   |   |   |   |   |    |    |       |   |   |   |   |   |   |   |   |   |   |   |   |   |   |   |   |   |   |   |   |   |   |   |   |   |   |   |   |   |   |   |
| M. auratus_GU172169     | (257) | N   | E   | N   | F   | R   | S | G | F | Q | A | F | Q | P | -- | A  | ----- |   |   |   |   |   |   |   |   |   |   |   |   |   |   |   |   |   |   |   |   |   |   |   |   |   |   |   |   |   |   |   |
| M. musculus_NM_133192   | (336) | N   | E   | N   | F   | R   | N | G | F | Q | A | F | Q | Q | -- | I  | C     | Q | K | K | A | K | P | Q | E | A | Y | S | L | R | A | K | R | N | I | V | I | N | T | S | G | L | L | V | Q | E | P | V |
| R. norvegicus_NM_023980 | (336) | N   | E   | N   | F   | R   | S | G | F | Q | A | F | Q | Q | -- | F  | C     | Q | K | K | V | K | P | Q | E | A | Y | G | L | R | A | K | R | N | I | D | I | N | T | S | G | L | L | V | H | E | P | A |
| H. sapiens_NM_053036    | (337) | N   | E   | N   | F   | R   | R | G | F | Q | A | F | Q | L | Q  | -- | I     | C | Q | K | R | A | K | E | M | E | A | Y | A | L | K | A | K | S | H | V | I | N | T | S | N | Q | L | V | Q | E | S | T |
| Consensus               | (337) | N   | E   | N   | F   | R   | S | G | F | Q | A | F | Q | Q | -- | I  | C     | Q | K | K | A | K | P | Q | E | A | Y | A | L | R | A | K | R | N | I | L | I | N | T | S | G | L | L | V | Q | E | P |   |

Section 9

|                         |       |       |     |     |     |     |       |   |   |   |   |   |   |   |   |   |   |   |   |   |   |   |   |   |   |   |   |   |   |   |   |   |   |   |   |    |    |    |
|-------------------------|-------|-------|-----|-----|-----|-----|-------|---|---|---|---|---|---|---|---|---|---|---|---|---|---|---|---|---|---|---|---|---|---|---|---|---|---|---|---|----|----|----|
|                         | (385) | 385   | 390 | 400 | 410 | 421 |       |   |   |   |   |   |   |   |   |   |   |   |   |   |   |   |   |   |   |   |   |   |   |   |   |   |   |   |   |    |    |    |
| M. auratus_GU172169     | (271) | ----- |     |     |     |     | ----- |   |   |   |   |   |   |   |   |   |   |   |   |   |   |   |   |   |   |   |   |   |   |   |   |   |   |   |   |    |    |    |
| M. musculus_NM_133192   | (382) | S     | Q   | N   | P   | G   | G     | E | N | L | G | C | G | K | S | A | D | N | P | T | Q | E | S | L | E | E | M | G | E | A | T | N | S | T | V | A  | -- |    |
| R. norvegicus_NM_023980 | (382) | S     | Q   | N   | P   | S   | G     | E | N | L | G | C | R | K | S | A | D | N | P | T | Q | E | S | L | M | E | E | T | G | E | A | T | N | S | T | E  | T  | -- |
| H. sapiens_NM_053036    | (385) | F     | Q   | N   | P   | H   | G     | E | T | L | L | Y | R | K | S | A | E | K | E | Q | E | L | V | M | E | E | T | K | E | T | N | S | S | E | I | -- |    |    |
| Consensus               | (385) | S     | Q   | N   | P   | G   | E     | N | L | G | C | R | K | S | A |   |   |   |   |   |   |   |   |   |   |   |   |   |   |   |   |   |   |   |   |    |    |    |
